# Supplementary material for: Abnormal Somatosensory Behaviors Associated With a Gain-of-Function Mutation in TRPV3 Channels
Source: PubMed Central journal article supplement (PMC8764439; doi:10.3389/fnmol.2021.790435), 2022-01-04

Figure S1

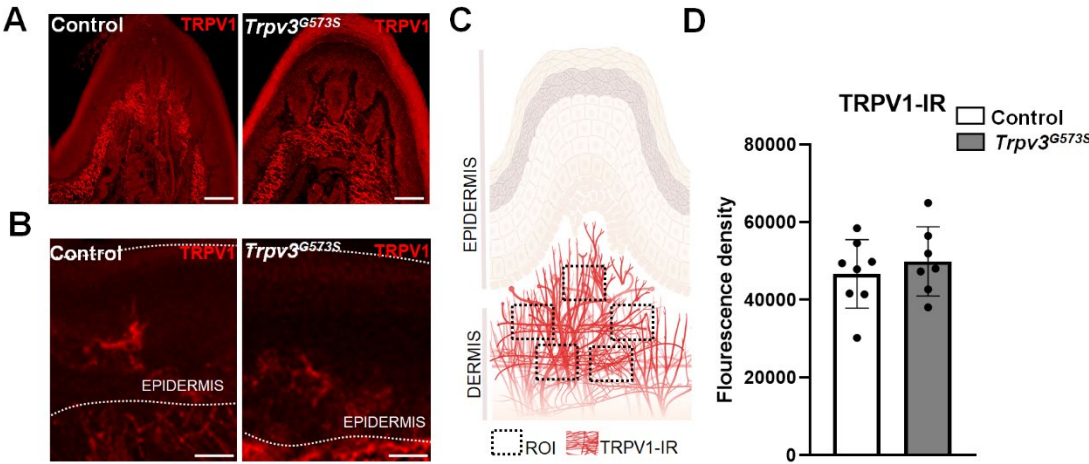

Supplement: Image_1.pdf [file Image_1.pdf]
